# Supplementary material for: Scopolin Attenuates Osteoporotic Bone Loss in Ovariectomized Mice
Source: MDPI journal article supplement (doi:10.3390/nu12113565), 2020-11-20
Supplement: s1 [file s1]

# Scopolin treatment prevents osteoporotic bone loss in ovariectomized mice

Eunkuk Park, Jeonghyun Kim, Hyun-Seok Jin, Chun Whan Choi, Tae Hyun Choi,

Sangho Choi, Dam Huh, and Seon-Yong Jeong

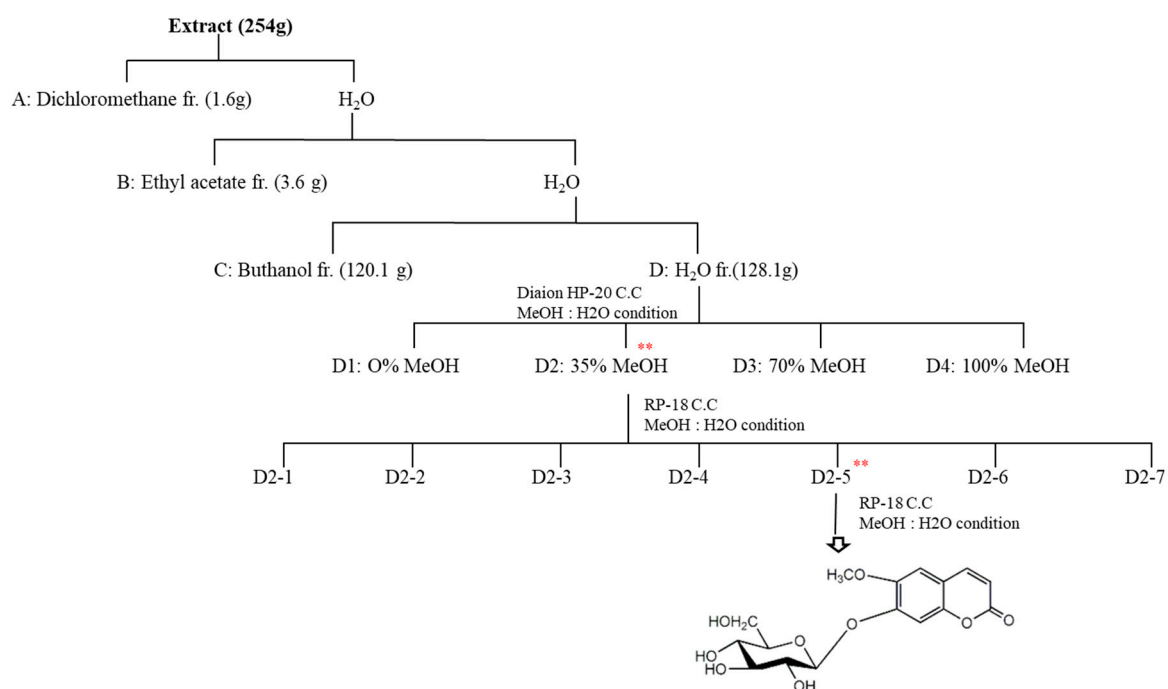

**Figure S1.** Fractionation and isolation of the bioactive component isolated from LRC

A

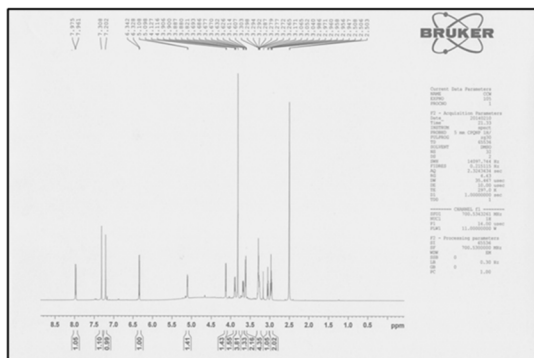

B

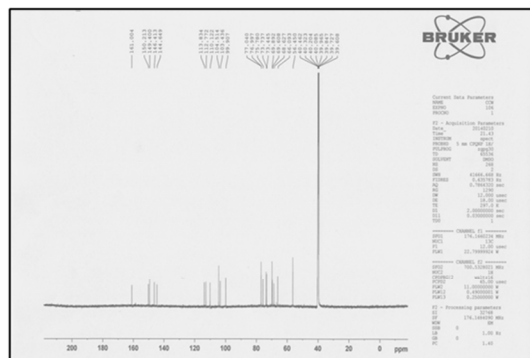

C

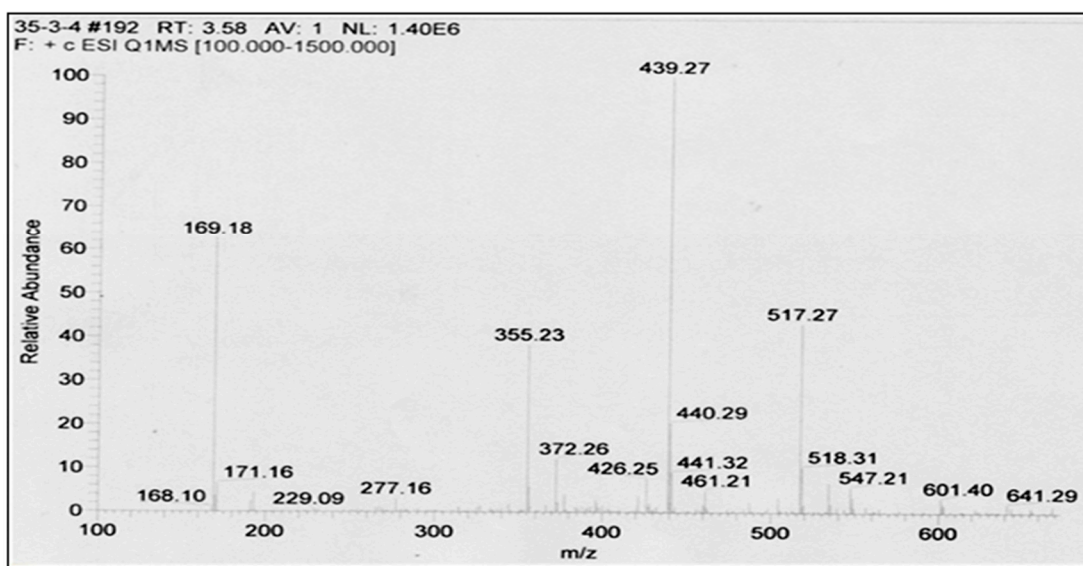

**Figure S2.** <sup>1</sup>H-NMR (A), <sup>13</sup>C-NMR (B), and mass (C) spectrum of scopolin.

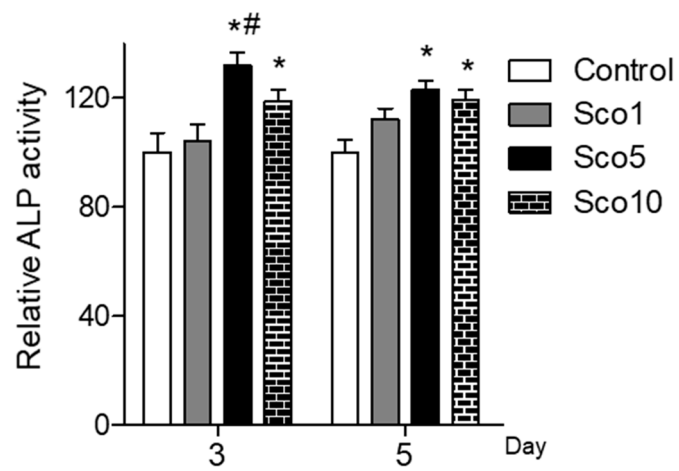

**Figure S3.** Scopolin increased alkaline phosphatase (ALP) activity after 3 and 5 days of incubation. The cells were cultured with three different concentrations of scopolin (1, 5 and 10  $\mu$ M), and alkaline phosphatase (ALP) activity was measured.  $*p < 0.05$  vs. control,  $^{\#}p < 0.05$  vs. Sco1.

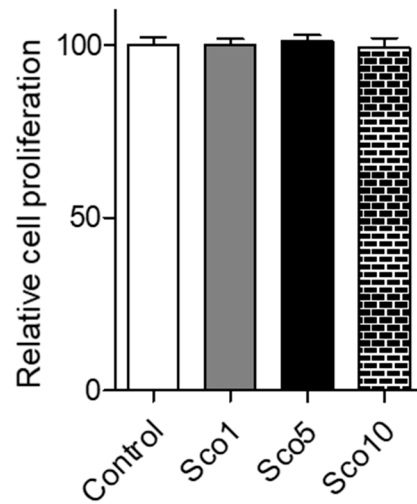

**Figure S4.** Scopolin did not affect proliferation of osteoblastic cells. The cells were cultured with three different concentrations of scopolin (1, 5 and 10  $\mu\text{M}$ ) for 5 days, and the cell viability was measured.

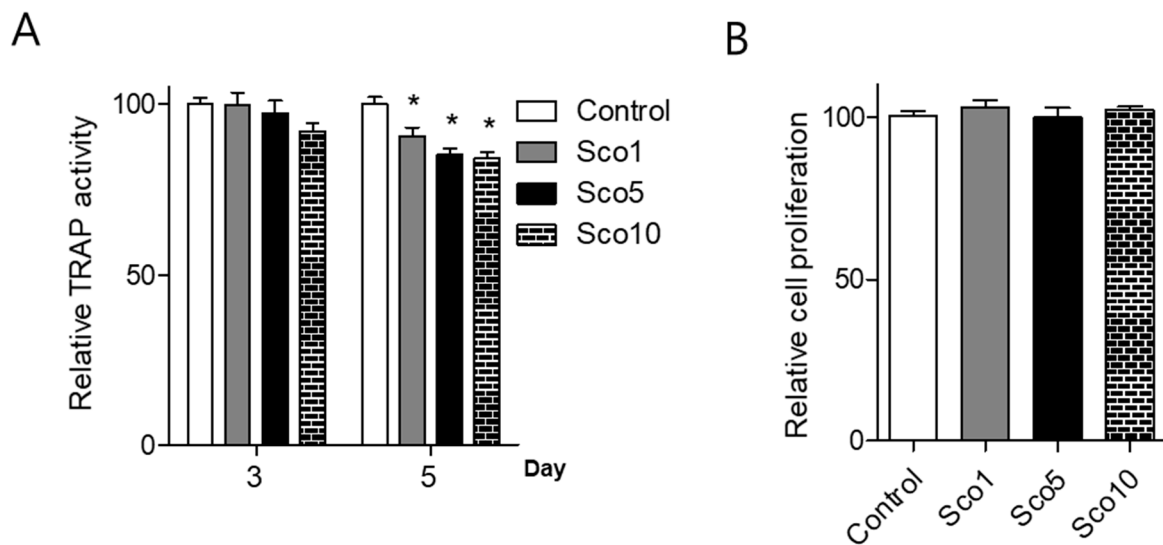

**Figure S5.** Scopolin reduced osteoclastic differentiation (A) and did not affect cell proliferation (B) in monocytes isolated from bone marrow. The monocyte cells were cultured for 3 and 5 days in the presence of 30 ng/ml of M-CSF and 50 ng/ml of RANKL (induction) or in the presence of M-CSF and RANKL with 1, 5, or 10  $\mu$ M of scopolin. \* $p < 0.05$  vs. control.

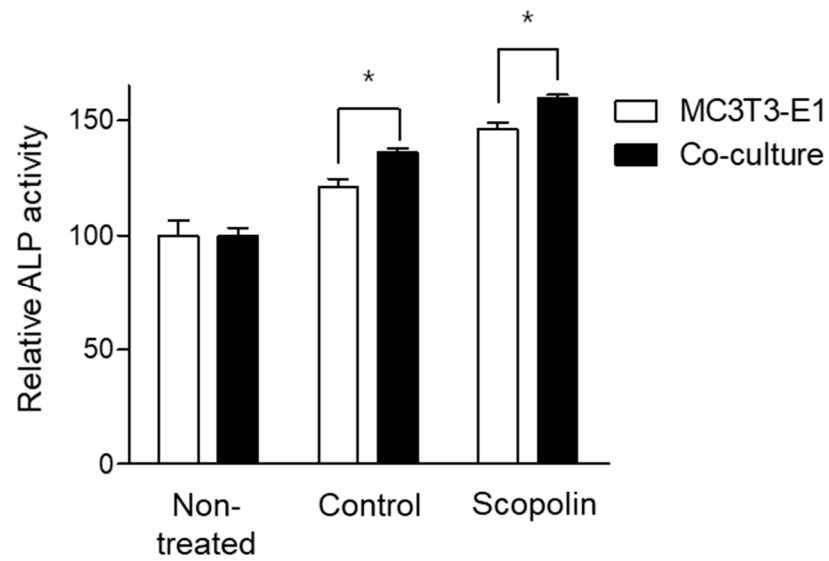

**Figure S6.** Co-culture of isolated monocytes with MC3T3-E1 osteoblastic cell line cells increased osteoblast differentiation compared to a single-culture of MC3T3-E1. The isolated monocyte and MC3T3-E1 cells were co-cultured for 48 hours and ALP activity was measured to determine osteoblast differentiation. \*:  $p < 0.05$ . vs. MC3T3-E1.
